# Supplementary material for: Controlling resistant bacteria with a novel class of β-lactamase inhibitor peptides: from rational design to in vivo analyses
Source: PubMed Central journal article supplement — Sci Rep. 2014 Aug 11;4:6015. doi: 10.1038/srep06015 (PMC4127500; doi:10.1038/srep06015), 2014-08-11
Supplement: srep06015-s1.pdf [file srep06015-s1.pdf]

## Supporting Information

### Controlling resistant bacteria with a novel class of $\beta$ -lactamase inhibitor peptides: from rational design to *in vivo* analyses

Santi M. Mandal<sup>1\*</sup>, Ludovico Migliolo<sup>2,3\*</sup>, Osmar N. Silva<sup>2\*</sup>, Isabel C.M.

Fensterseifer<sup>2</sup>, Celio Faria-Júnior.<sup>4</sup>, Simoni C. Dias<sup>2</sup>, Amit Basak<sup>1</sup>, Tapas

K. Hazra<sup>5</sup> and Octávio L. Franco<sup>2,3\*</sup>

#### Table of Contents.

S1- Supplementary Table 1.  
S2- Supplementary Figure 1  
S3- Supplementary Figure 2  
S4 – Supplementary Figure 4  
S5 – Supplementary Table 2  
S6 – Supplementary Table 3

**Supplementary Table 1.** Data derived after fitting the raw heat associated data with nonlinear regression.

| <b>Parameters</b>            | <b>dBLIP-1</b>                           | <b>dBLIP-2</b>                           |
|------------------------------|------------------------------------------|------------------------------------------|
| <b>K</b>                     | $6.33 \pm 0.52E^4 \text{ M}^{-1}$        | $4.5 \pm 0.18E^4 \text{ M}^{-1}$         |
| <b><math>\Delta H</math></b> | $-12.9 \pm 0.56E^4 \text{ cal.mol}^{-1}$ | $-35.7 \pm 0.82E^3 \text{ cal.mol}^{-1}$ |
| <b><math>\Delta S</math></b> | $-415 \text{ cal/mol/deg}$               | $-98.6 \text{ cal/mol/deg}$              |

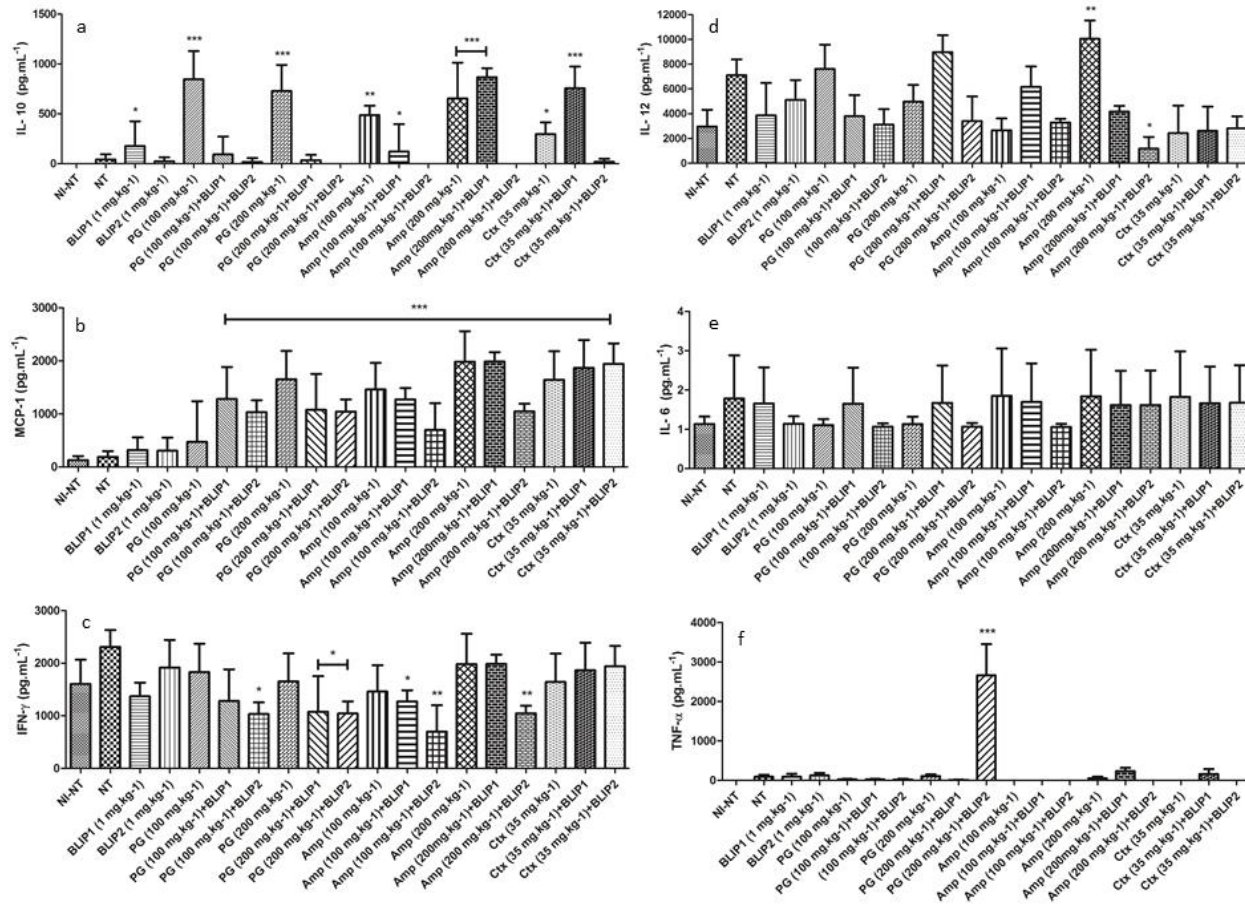

**Supplementary Figure 1.** dBLIP-1 and dBLIP-2 effects on immune response of mice in *in vivo* model under *Staphylococcus aureus* infection. Determination of IL-10 (A), MCP-1 (B), IFN- $\gamma$  (C), IL-12 (D), IL-6 (E) and TNF- $\alpha$  (F) in *S. aureus* groups treated with dBLIP 1 and 2 alone or in combination with (PG) penicillin, (AMP) ampicillin and (CFX) cefotaxime. Bars represent means and SEs from three to six independent experiments. Results are shown as mean  $\pm$  SD from triplicate measurements. \* $p$ , 0.05; \*\* $p$ , 0.01; \*\*\* $p$ , 0.001; comparison by ANOVA with Tukey's post hoc test.

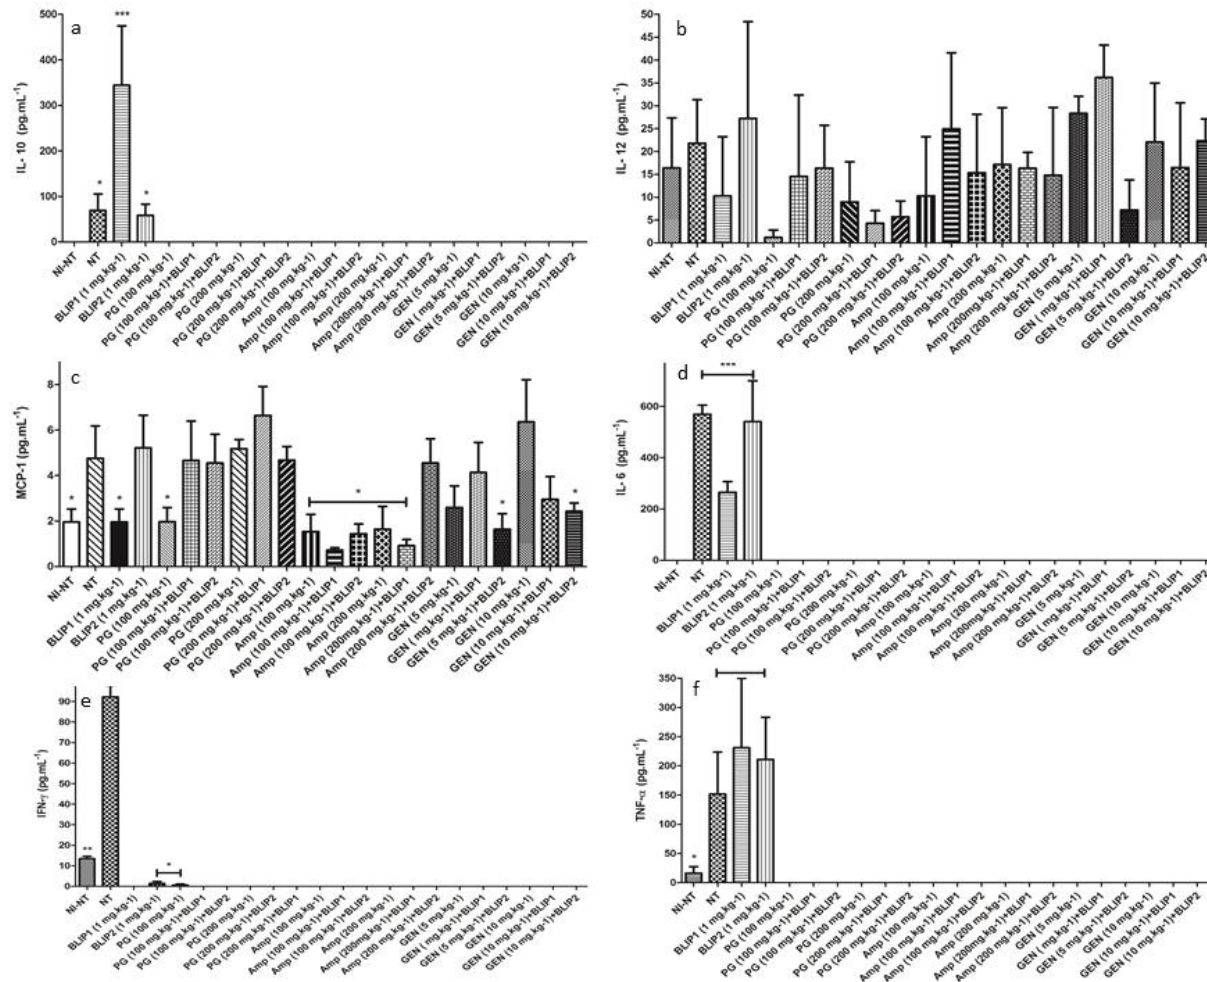

**Supplementary Figure 2.** dBLIP-1 and dBLIP-2 effects on immune response of mice in *in vivo* model under *Escherichia coli* infection. Determination of IL-10 (A), MCP-1 (B), IFN- $\gamma$  (C), IL-12 (D), IL-6 (E) and TNF- $\alpha$  (F) in *E. coli* groups treated with dBLIP 1 and 2 alone or in combination with (PG) penicillin, (AMP) ampicillin and (GEN) gentamicine. Bars represent means and SEs from three to six independent experiments. Results are shown as mean  $\pm$  SD from triplicate measurements. \*p, 0.05; \*\*p, 0.01; \*\*\*p, 0.001; comparison by ANOVA with Tukey's post hoc test.

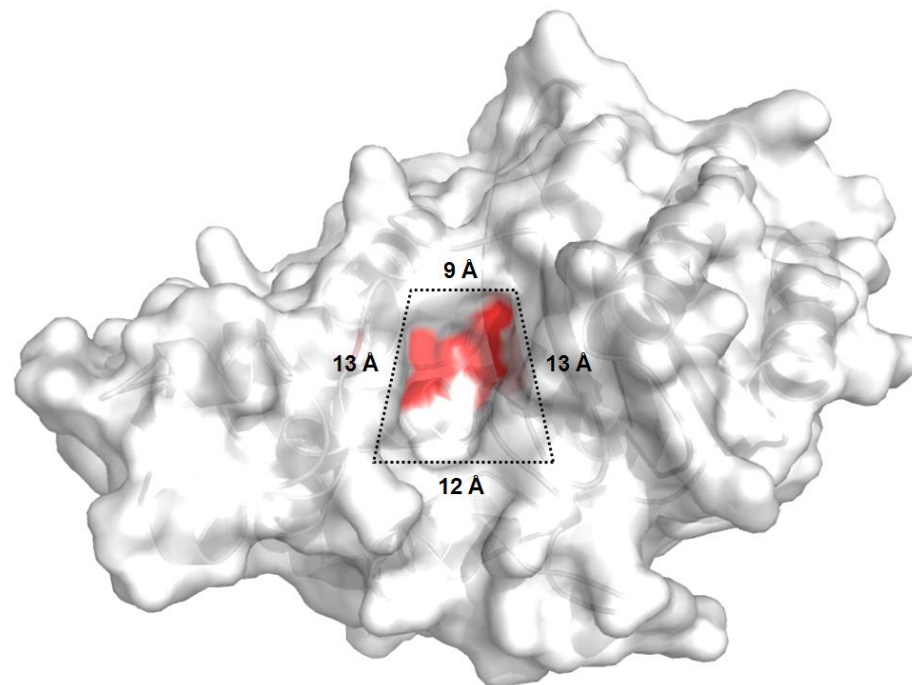

**Supplementary Figure 3.** Three-dimensional structure of *E. coli*  $\beta$ -lactamase firstly utilized for peptide design. The trapezoid highlight (dotted lines) represents the catalytic pocket area (red region) and neighbour regions used for docking analysis.

**Supplementary Table 2.**  $\beta$ -Lactamases present in different clinical isolates here studied. AmpC lactamases correspond to cephalosporinases.

ESBLs correspond to extended-spectrum  $\beta$ -lactamases and MBL to metallo- $\beta$ -lactamase.

| Clinical isolates                        | Beta-lactamases |                                   |
|------------------------------------------|-----------------|-----------------------------------|
| ID No 2101123<br><i>E. coli</i>          | AmpC            | ESBL                              |
| ID No 6881<br><i>E. coli</i>             | AmpC            | MBL                               |
| ID No 1812446<br><i>E. coli (blaKPC)</i> | AmpC            | MBL                               |
| ID No 6817<br><i>P. aeruginosa</i>       | AmpC            | ESBL                              |
| ID No 7314<br><i>S. aureus</i>           | AmpC            | ESBL                              |
| ID No ATCC33591<br><i>S. aureus</i>      | Ampc            | TEM-1 like $\beta$ -<br>lactamase |
| ID No 6591<br><i>B. cereus</i>           | AmpC            | ESBL                              |

## S6

**Supplementary Table 3.** Peptides rationally designed evaluated against  $\beta$ -lactamases. Assays were *in vitro* performed toward  $\beta$ -lactamases from *E. coli* and *S. aureus* showing the presence (+) or absence of inhibition activity (-).

| Peptides | Sequence | Activity |
|----------|----------|----------|
| dBLIP-1  | KKGEE    | +        |
| dBLIP-2  | KQGQE    | +        |
| dBLIP-3  | KNGNE    | -        |
| dBLIP-4  | KNPNE    | -        |
| dBLIP-5  | KQPQE    | -        |
| dBLIP-6  | KGPGE    | -        |
| dBLIP-7  | KGPAE    | -        |
